# Supplementary material for: Solution-processed and thickness-insensitive hole transport layer for high efficiency organic solar cells
Source: Royal Society of Chemistry journal article supplement (doi:10.1039/d2tc04298c), 2022-01-01
Supplement: d2tc04298c1.pdf [file d2tc04298c1.pdf]

## Supporting Information for

### Solution-processed and Thickness-insensitive Hole Transport Layer for High Efficiency Organic Solar Cells

*Xueting Yi,<sup>ab</sup> He Liu,<sup>\*c</sup> Youzhan Li,<sup>ab</sup> Zekun Liu,<sup>ab</sup> Jiang Wu,<sup>ab</sup> Hao Tang,<sup>ab</sup> Yingying*

*Fu<sup>\*a</sup> and Zhiyuan Xie<sup>\*ab</sup>*

<sup>a</sup> *State Key Laboratory of Polymer Physics and Chemistry, Changchun Institute of Applied Chemistry, Chinese Academy of Sciences, Changchun 130022, P. R. China.*

<sup>b</sup> *School of Applied Chemistry and Engineering, University of Science and Technology of China, Hefei 230026, P. R. China.*

<sup>c</sup> *College of Environmental Science and Engineering, Jilin Normal University, Siping, P. R. China.*

Corresponding authors: xiezy\_n@ciac.ac.cn (Z. Y. Xie); fyy@ciac.ac.cn (Y. Y. Fu);  
liuhe@jlnu.edu.cn (H. Liu)

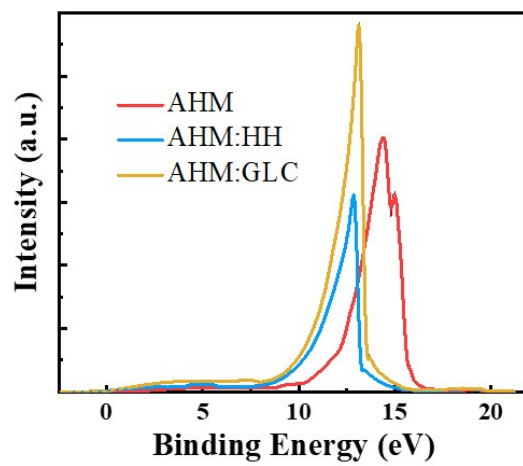

**Figure S1.** UPS spectra of the MoO<sub>x</sub> films prepared from the AHM, AHM:HH (4:1) and AHM:GLC (8:1) precursor solutions.

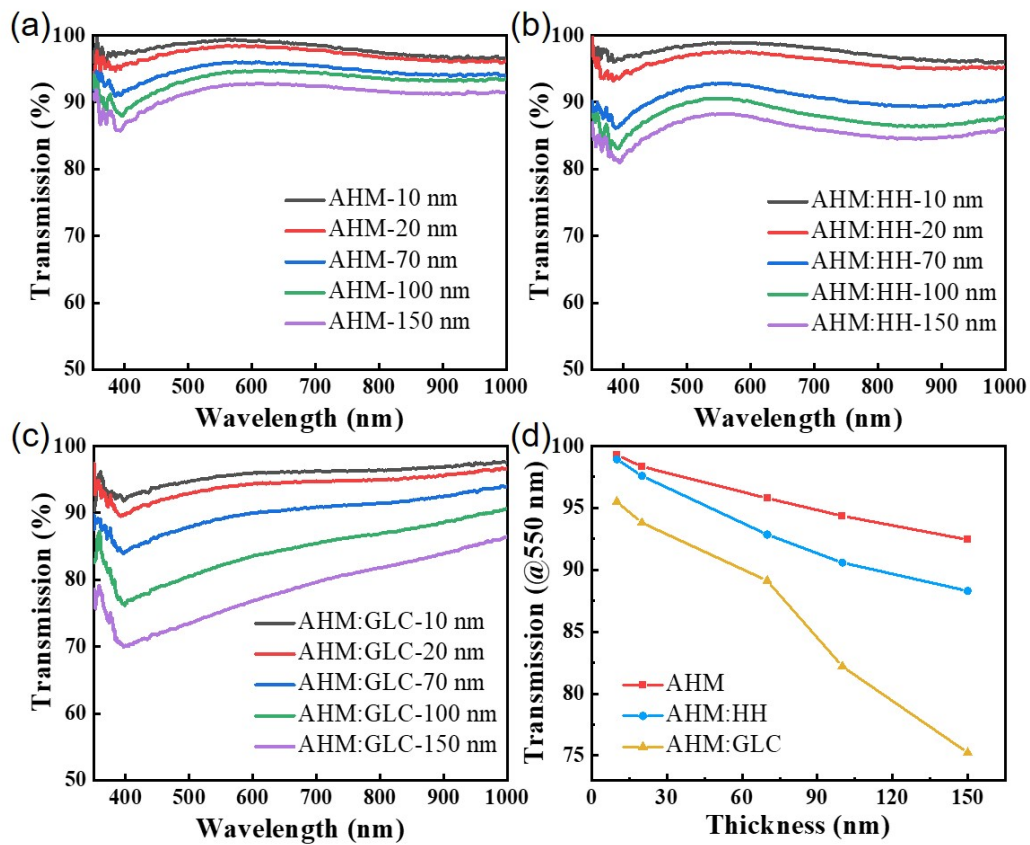

**Figure S2.** Transmission spectra of the thickness-different MoO<sub>x</sub> films prepared from (a) pure AHM, (b) AHM:HH (4:1, w/w) and (c) AHM:GLC (8:1, w/w) precursor solutions. (d) thickness dependence of transmittance at 550 nm for the films prepared from pure AHM, AHM:HH (4:1, w/w) and AHM:GLC (8:1, w/w) precursor solutions, respectively.

**Table S1.** Photovoltaic parameters of the OSCs based on different thickness HTL prepared from pure AHM precursor solution.

| HTL | Thickness<br>(nm) | $V_{OC}$<br>(V) | $J_{SC}$<br>(mA cm <sup>-2</sup> ) | $J_{cal}$<br>(mA cm <sup>-2</sup> ) | FF<br>(%) | PCE<br>(%)            |
|-----|-------------------|-----------------|------------------------------------|-------------------------------------|-----------|-----------------------|
| AHM | 10                | 0.82            | 25.62                              | 24.50                               | 69.03     | 14.53<br>(14.49±0.40) |
|     | 20                | 0.81            | 25.25                              | 24.26                               | 63.47     | 12.98<br>(12.96±0.38) |
|     | 40                | 0.80            | 23.93                              | 22.83                               | 58.60     | 11.16<br>(11.12±0.45) |
|     | 70                | 0.80            | 23.77                              | 22.64                               | 55.98     | 10.66<br>(10.30±0.35) |
|     | 100               | 0.81            | 22.06                              | 22.25                               | 56.30     | 10.06<br>(9.93±0.24)  |
|     | 150               | 0.81            | 22.63                              | 21.70                               | 45.25     | 8.29<br>(8.25±0.41)   |

<sup>a</sup> $J_{cal}$  was obtained from the EQE data, the average PCE was calculated from 10 devices.

**Table S2.** Photovoltaic parameters of the OSCs based on different thickness HTL prepared from AHM:HH (4:1) precursor solution.

| HTL    | Thickness<br>(nm) | $V_{OC}$<br>(V) | $J_{SC}$<br>(mA cm <sup>-2</sup> ) | $J_{cal}$<br>(mA cm <sup>-2</sup> ) | FF<br>(%) | PCE<br>(%)            |
|--------|-------------------|-----------------|------------------------------------|-------------------------------------|-----------|-----------------------|
| AHM:HH | 10                | 0.84            | 25.99                              | 24.62                               | 72.95     | 15.92<br>(15.99±0.12) |
|        | 20                | 0.84            | 25.90                              | 24.04                               | 72.97     | 15.77<br>(15.77±0.11) |
|        | 40                | 0.83            | 25.75                              | 23.65                               | 72.49     | 15.51<br>(15.43±0.37) |
|        | 70                | 0.83            | 24.76                              | 23.47                               | 70.49     | 14.53<br>(14.44±0.29) |
|        | 100               | 0.83            | 24.34                              | 23.10                               | 72.69     | 14.72<br>(14.46±0.28) |
|        | 150               | 0.84            | 24.21                              | 23.08                               | 70.88     | 14.35<br>(14.29±0.19) |

<sup>a</sup> $J_{cal}$  was obtained from the EQE data, the average PCE was calculated from 10 devices.

**Table S3.** Photovoltaic parameters of the OSCs based on different thickness HTL prepared from AHM:GLC (8:1) precursor solution.

| HTL     | Thickness (nm) | $V_{oc}$ (V) | $J_{sc}$ (mA cm <sup>-2</sup> ) | $J_{cal}$ (mA cm <sup>-2</sup> ) | FF (%) | PCE (%)               |
|---------|----------------|--------------|---------------------------------|----------------------------------|--------|-----------------------|
| AHM:GLC | 10             | 0.83         | 25.89                           | 24.40                            | 73.91  | 15.94<br>(15.75±0.32) |
|         | 20             | 0.84         | 25.52                           | 24.28                            | 72.91  | 15.59<br>(15.41±0.41) |
|         | 40             | 0.83         | 24.45                           | 23.09                            | 72.10  | 14.66<br>(14.55±0.26) |
|         | 70             | 0.82         | 23.74                           | 22.73                            | 72.33  | 14.17<br>(14.03±0.47) |
|         | 100            | 0.83         | 22.84                           | 21.73                            | 71.63  | 13.65<br>(13.29±0.39) |
|         | 150            | 0.82         | 21.42                           | 20.18                            | 71.31  | 12.60<br>(12.55±0.37) |

<sup>a</sup> $J_{cal}$  was obtained from the EQE data, the average PCE was calculated from 10 devices.
